# Supplementary material
Source: publisher figshare collection journal article supplement (https://karger.figshare.com/ndownloader/files/26251510)
Supplement: Supplementary file 1 [file 26251510]

**Table S3: Countries or regions that published the top 100 articles.**

| **Country** | **Publication** | **TC** | **TC/Publication** |
| --- | --- | --- | --- |
| USA | 33 | 32,111 | 973.06 |
| Italy | 30 | 32,048 | 1,068.27 |
| Mainland China | 27 | 19,528 | 723.26 |
| Japan | 26 | 16,324 | 627.85 |
| France | 23 | 20,873 | 907.52 |
| Spain | 19 | 24,364 | 1,282.32 |
| Germany | 15 | 19,844 | 1,322.93 |
| Taiwan | 12 | 10,428 | 869.00 |
| United Kingdom | 11 | 8,045 | 731.36 |
| Canada | 8 | 10,861 | 1,357.63 |
| South Korea | 7 | 6,882 | 983.14 |
| Belgium | 6 | 10,721 | 1,786.83 |
| Russia | 3 | 2,287 | 762.33 |
| Brazil | 2 | 8,296 | 4,148.00 |
| Austria | 2 | 1,931 | 965.50 |
| Netherlands | 2 | 1,461 | 730.50 |
| Poland | 2 | 1,827 | 913.50 |
| Switzerland | 2 | 1,931 | 965.50 |
| New Zealand | 1 | 7,243 | 7,243.00 |
| Singapore | 1 | 1,096 | 1,096.00 |
| Hungary | 1 | 1,073 | 1,073.00 |
| Portugal | 1 | 1,053 | 1,053.00 |
| Sweden | 1 | 1,053 | 1,053.00 |
| Israel | 1 | 930 | 930.00 |
| Greece | 1 | 878 | 878.00 |
| Australia | 1 | 853 | 853.00 |
| Mexico | 1 | 440 | 440.00 |
| Thailand | 1 | 440 | 440.00 |
| Turkey | 1 | 408 | 408.00 |

TC: total citation
